# Supplementary material for: Ponatinib exerts anti-angiogenic effects in the zebrafish and human umbilical vein endothelial cells via blocking VEGFR signaling pathway
Source: PubMed Central journal article supplement (PMC6112840; doi:10.18632/oncotarget.24110), 2018-01-10
Supplement: oncotarget-09-31958-s001.pdf [file oncotarget-09-31958-s001.pdf]

## **Ponatinib exerts anti-angiogenic effects in the zebrafish and human umbilical vein endothelial cells via blocking VEGFR signaling pathway**

### **SUPPLEMENTARY MATERIALS**

**Supplementary Table 1: Drugs screened in the zebrafish.** See [Supplementary Table 1](#)
